# Supplementary material
Source: PubMed Central journal article supplement (PMC7839024)
Supplement: AJA-29-152-s001.pdf [file AJA-29-152-s001.pdf]

### Supplemental Material S1. Description of priors for Bayesian regression model.

The  $\alpha$ ,  $\xi$ , and  $\omega$  parameters were given  $N_2(\mathbf{0}, \mathbf{I}_2)$  priors, representing bivariate normal densities with mean vector  $\mathbf{0}$  and an identity matrix covariance. The  $\beta$  parameter was also given a bivariate normal prior centered at positive growth so that

$\beta \sim N_2\left(\mathbf{0.25}, \begin{bmatrix} 0.5 & 0 \\ 0 & 0.5 \end{bmatrix}\right)$ . The subject-specific intercepts  $\delta_s$  were given  $N_2(\mathbf{0}, \tau_\delta)$  priors,

with a 3 degree of freedom inverse Wishart prior on  $\tau_\delta$ . The group effects  $\gamma_G$ , the level effects  $\theta_L$ , and the group by level interaction effects  $\nu_{G,L}$  were given hierarchical Half- $t$  priors (Alvarez et al., 2014; Huang & Wand, 2013) to induce shrinkage towards constant effects unless the data dictate otherwise.

### References

- Alvarez, I., Niemi, J., & Simpson, M. (2014). Bayesian inference for a covariance matrix. *Annual Conference on Applied Statistics in Agriculture*, 26, 71–82.
- Huang, A., & Wand, M. P. (2013). Simple marginally noninformative prior distributions for covariance matrices. *Bayesian Analysis*, 8(2), 439–452.
